# Supplementary material for: Cancer Cell Response to Anthracyclines Effects: Mysteries of the Hidden Proteins Associated with These Drugs
Source: MDPI journal article supplement (doi:10.3390/ijms131215536), 2012-11-22
Supplement: s2 [file s2]

## Sheet: List1
Significantly regulated proteins identified in 2-DE experiment including spot number, protein name, Swiss-Prot database number, number of peptides matched to the identified protein, number of unassigned peaks, sequence coverage, Mascot score of the identified protein, Mascot score for the highest ranked hit to a non-homologous protein, peptide sequences confirmed by MS/MS (Mascot score given in p…
S1(A)	Differentially expressed proteins in pH range 4-7 of the 2-DE experiment
Spot No.	Protein name	Accession No.	No. matching peptides	Umatched peaks	Sequence coverage (%)	Mascot score Top hit	Mascot score 2nd hit	Peptide sequence (Mascot score)	MW (kDa)	pI
4	L-lactate dehydrogenase B chain	P07195	15	3	40	181	26	No	37	5.7
7	Rho GDP-dissociation inhibitor 2	P52566	9	4	48	115	40	No	23	5.1
11	Elongation factor 1-gamma	P26641	11	5	26	126	45	No	50	6.3
12	Protein disulfide-isomerase A3	P30101	18	3	38	241	46	No	57	6
22	Heterogeneous nuclear ribonucleoprotein F	P52597	9	4	29	107	36	No	46	5.4
24	Stress-70 protein, mitochondrial	P38646	26	1	47	348	41	No	74	5.9
25	60S acidic ribosomal protein P0	P05388	14	2	51	218	56	No	34	5.7
29	Heat shock 70 kDa protein 1A/1B	P08107	17	2	30	226	43	No	70	5.5
35	T-complex protein 1 subunit beta	P78371	18	4	48	231	53	No	57	6
36	Stathmin	P16949	9	3	44	120	39	No	17	5.8
41	Gamma-enolase	P09104	8	2	30	118	43	No	47	4.9
45	Peptidyl-prolyl cis-trans isomerase FKBP4	Q02790	18	5	52	241	77	No	52	5.4
64	60 kDa heat shock protein, mitochondrial	P10809	11	2	27	119	24	No	61	5.7
68	T-complex protein 1 subunit gamma	P49368	15	5	28	141	48	No	60	6.1
70	Actin, cytoplasmic 1	P60709	17	2	53	224	114	No	42	5.3
83	Activator of 90 kDa heat shock protein ATPase homolog 1	O95433	14	2	45	213	47	No	38	5.4
91	DNA replication licensing factor MCM7	P3399	10	2	19	116	35	SLEQNIQLPAALLSR (37)	81	6.1
97	Cytochrome b-c1 complex subunit 1, mitochondrial	P31930	16	5	33	163	30	No	53	5.9
116	RuvB-like 1	Q9Y265	11	2	35	158	39	ALESSIAPIVIFASNR (56)	50	6
125	Heat shock 70 kDa protein 4	P34932	16	3	26	147	32	No	94	5.1
126	Cofilin-1	P23528	16	4	71	213	33	No	19	8.2
131	60 kDa heat shock protein, mitochondrial	P10809	14	2	28	171	39	No	61	5.7
136	Transaldolase	P37837	15	1	46	231	43	No	38	6.4
140	78 kDa glucose-regulated protein	P11021	12	1	26	175	31	No	72	5
141	Caprin-1	Q14444	8	5	11	81	52	GKLDDYQER (43)	78	5.1
144	Prohibitin	P35232	11	2	60	187	47	No	30	5.6
153	D-3-phosphoglycerate dehydrogenase	O43175	11	1	28	155	31	EELIAELQDCEGLIVR (57) ALQSGQCAGAALDVFTEEPPRDR (57)	57	6.3
159	Succinyl-CoA:3-ketoacid-coenzyme A transferase 1, mitochondrial	P55809	8	2	23	94	28	No	56	7.1
166	Dihydrolipoyllysine-residue acetyltransferase component of pyruvate dehydrogenase complex, mitochondrial	P10515	8	1	15	108	40	VVDGAVGAQWLAEFR (94)	67	8.0
220	Heterogeneous nuclear ribonucleoprotein H	P31943	10	2	25	121	35	No	49	5.9
221	Plastin-2	P13796	13	2	25	142	44	No	70	5.3
223	Mitochondrial inner membrane protein	Q16891	17	2	27	206	51	No	84	6.1
230	Proteasome subunit alpha type-5	P28066	8	3	48	132	45	No	26	4.7
233	Rab GDP dissociation inhibitor alpha	P84103	12	5	32	148	43	No	50	5
242	Splicing factor, arginine/serine-rich 3	P84103	6	2	37	103	36	NPPGFAFVEFEDPR (35)	19	11.6
244	Heterogeneous nuclear ribonucleoprotein H	P31943	10	2	37	148	35	No	49	5.9
267	Hematopoietic lineage cell-specific protein	P14317	6	1	18	85	40	EHPVPLLPIR (37)	54	4.7
278	Spermidine synthase	P19623	8	1	33	129	35	No	34	5.3
279	Protein disulfide-isomerase A3	P30101	8	2	24	104	49	No	57	6
282	Ubiquitin-like modifier-activating enzyme 1	P22314	15	3	18	161	45	No	118	5.5
287	DnaJ homolog subfamily A member 2	O60884	9	3	20	109	34	No	46	6.1
289	Galactokinase	P51570	7	1	27	106	37	No	42	6
291	Peptidyl-prolyl cis-trans isomerase FKBP5	Q13451	5	2	17	64	41	EEQCILYLGPR (42)	51	5.7
295	Dynactin subunit 2	Q13561	14	4	40	167	36	No	44	5.1
297	Heat shock 70 kDa protein 1A/1B	P08107	8	2	16	88	41	No	70	5.5
308	F-actin-capping protein subunit alpha-2	P47755	12	2	62	193	43	No	33	5.6
311	Protein disulfide-isomerase A3	P30101	9	2	22	119	46	No	57	6.0
318	Splicing factor, arginine/serine-rich 7	Q16629	10	4	34	142	47	NPPGFAFVEFEDPRDAEDAVR (37)	27	11.8
320	Heat shock protein 75 kDa, mitochondrial	Q12931	10	2	19	124	44	YESSALPSGQLTSLSEYASR (99)	80	8.3
346	Transitional endoplasmic reticulum ATPase	P55072	11	1	16	104	28	No	89	5.1
360	Mitochondrial-processing peptidase subunit alpha	Q10713	11	5	25	119	30	No	58	6.5
364	4-trimethylaminobutyraldehyde dehydrogenase	P49189	6	3	17	67	39	ANDTTFGLAAGVFTR (80) STGTFVVSQPLNYR (40)	54	5.7
382	Annexin A5	P08758	6	3	24	87	68	QVYEEEYGSSLEDDVVGDTSGYYQR (158)	36	4.9
399	Anamorsin	Q6FI81	6	2	24	75	25	EPLTPEEVQSVR (30)	34	5.4
407	Protein phosphatase methylesterase 1	Q9Y570	6	2	19	81	39	LPSRPPLPGSGGSQSGAK (41)	42	5.7
413	NADH-ubiquinone oxidoreductase 75 kDa subunit, mitochondrial	P28331	12	1	20	156	28	No	79	5.9
424	ATP synthase subunit beta, mitochondrial	P06576	12	2	28	148	26	No	57	5.3
428	Quinone oxidoreductase-like protein 1	O95825	11	4	48	163	48	No	39	5.5
437	L-lactate dehydrogenase B chain	P07195	7	4	26	100	36	VIGSGCNLDSAR (46)	37	5.7
442	Serine/threonine-protein phosphatase 2A 65 kDa regulatory subunit A alpha isoform	P30153	8	1	14	111	44	No	65	5
455	G-rich sequence factor 1	Q12849	8	1	20	95	41	No	53	5.8
461	Rho GDP-dissociation inhibitor 2	P52566	13	7	65	180	45	No	23	5.1
466	Eukaryotic translation initiation factor 3 subunit G	O75821	7	4	24	88	65	GFAFISFHR (31) ETDLQELFRPFGSISR (38)	35	5.9
526	Rab GDP dissociation inhibitor beta	P50395	11	5	35	145	36	No	51	6.1
541	Heat shock protein 105 kDa	Q92598	8	1	12	91	41	No	97	5.3
561	Gamma-enolase	P09104	7	3	20	93	47	No	47	4.9
569	SUMO-activating enzyme subunit 2	Q9UBT2	10	3	22	124	37	YLFNQLFGEEDADQEVSPDR (59) QFILVMNALDNR (41)	71	5.2
573	60 kDa heat shock protein, mitochondrial	P10809	10	2	21	99	48	No	61	5.7
574	TAR DNA-binding protein 43	Q13148	4	1	11	53	36	FGGNPGGFGNQGGFGNSR (118)	45	5.9
583	Dual specificity mitogen-activated protein kinase kinase 2	P36507	7	4	25	88	49	No	44	6.1
592	Ezrin	P15311	10	1	18	131	36	No	69	5.9
595	L-aminoadipate-semialdehyde dehydrogenase-phosphopantetheinyl transferase	Q9NRN7	6	2	20	79	41	No	36	6.4
597	Succinyl-CoA:3-ketoacid-coenzyme A transferase 1, mitochondrial	P55809	8	4	26	91	35	MVSSYVGENAEFER (48)	56	7.1
615	Transformer-2 protein homolog beta	P62995	5	5	23	64	39	YGPIADVSIVYDQQSR (53)	34	11.3
630	Ubiquitin-like domain-containing CTD phosphatase 1	Q8WVY7	7	1	30	106	36	NTIMFDDIGR (26)	37	6.1
635	Semenogelin-1	P04279	7	1	15	99	55	No	52	9.3
642	Paraspeckle component 1	Q8WXF1	6	1	17	74	41	GFVEFAAKPPAR (37) FAQPGTFEFEYASR (41)	59	6.3
645	Gametocyte-specific factor 1	Q8WW33	7	2	37	120	33	SCIEQDVVNQTR (45) LLQCPYDKNHQIR (37)	19	6
647	Mitochondrial inner membrane protein	Q16891	14	4	23	163	50	No	84	6.1
671	Charged multivesicular body protein 2a	O43633	6	4	18	73	63	KAEAAASALADADADLEER (80) Ac-MDLLFGR (33) IMMEFER (35)	25	5.9
679	Stathmin	P16949	6	1	40	99	43	ASGQAFELILSPR (46)	17	5.8
699	Rho GDP-dissociation inhibitor 2	P52566	6	4	37	93	34	No	23	5.1
702	4-trimethylaminobutyraldehyde dehydrogenase	P49189	6	4	15	62	36	ANDTTFGLAAGVFTR (82)	54	5.7
768	Glutathione synthetase	P48637	9	2	22	114	26	No	52	5.7
783	Serine/threonine-protein phosphatase 2A 65 kDa regulatory subunit A beta isoform	P30154	7	3	14	83	53	LASGDWFTSR (55) TSACGLFSVCYPR (78)	66	4.8
787	Glutathione S-transferase P	P09211	6	5	44	92	35	No	23	5.4
791	Phosphoserine phosphatase	P78330	7	1	57	131	34	No	25	5.5
801	Hypoxia up-regulated protein 1	Q9Y4L1	8	1	9	88	38	DAVVYPILVEFTR (75)	111	5.2
849	Heterogeneous nuclear ribonucleoprotein F	P52597	6	2	20	76	35	No	46	5.4
908	GTP-binding protein SAR1b	Q9Y6B6	5	4	34	79	32	IDRPEAISEER (45) QGYGEGFR (39)	22	5.8
1025	Serine/threonine-protein kinase 3	Q13188	7	4	21	87	37	AIFMIPTNPPPTFR (49)	56	5.1
1033	Signal transducing adapter molecule 1	Q92783	6	2	17	74	56	PLFATNPFDQDVEK (50)	59	4.7
1050	Adenylosuccinate synthetase isozyme 2	P30520	9	1	28	131	42	No	50	6.1
1415	Crk-like protein	P46109	8	2	36	128	48	No	34	6.3
S1(B)	Differentially expressed proteins in pH range 6-11 of the 2-DE experiment
Spot No.	Protein name	Accession No.	No. matching peptides	Umatched peaks	Sequence coverage (%)	Mascot score Top hit	Mascot score 2nd hit	Peptide sequence (Mascot score)	MW (kDa)	pI
4b	Elongation factor 2	P13639	16	5	17	146	46	No	95	6.4
8b	Phosphoglycerate kinase 1	P00558	15	6	49	177	39	No	45	8.3
15b	Heterogeneous nuclear ribonucleoprotein H3	P31942	15	1	63	232	45	No	37	6.4
22b	Glucose-6-phosphate isomerase	P06744	11	1	21	120	51	No	63	8.4
25b	Peptidyl-prolyl cis-trans isomerase	P62937	18	5	59	183	42	No	18	7.7
30b	Staphylococcal nuclease domain-containing protein 1	Q7KZF4	9	1	12	107	42	No	102	6.7
33b	C-1-tetrahydrofolate synthase, cytoplasmic	P11586	9	2	10	98	36	GVPTGFILPIR (42) LDIDPETITWQR (42)	101	6.9
34b	Inosine-5'-monophosphate dehydrogenase 2	P12268	9	2	17	125	46	No	56	6.4
36b	Peptidyl-prolyl cis-trans isomerase A	P62937	11	3	55	155	41	No	18	7.7
37b	C-1-tetrahydrofolate synthase, cytoplasmic	P11586	19	5	22	201	41	No	101	6.9
44b	Far upstream element-binding protein 2	Q92945	12	1	31	175	34	No	73	6.8
46b	GMP synthase [glutamine-hydrolyzing]	P49915	10	3	18	115	41	QADFEAHNILR (47)	77	6.4
53b	Poly(rC)-binding protein 1	Q15365	9	2	42	141	58	No	37	6.7
61b	KH domain-containing, RNA-binding, signal transduction-associated protein 1	Q07666	11	4	24	112	31	No	48	8.7
63b	EH domain-containing protein 1	Q9H4M9	8	1	16	110	34	HLIEQDFPGMR (22) LNAFGNAFLNR (35)	61	6.4
72b	Proteasome subunit beta type-2	P49721	5	1	36	82	34	No	23	6.5
85b	DAZ-associated protein 1	Q96EP5	5	1	18	76	46	No	43	8.7
96b	Obg-like ATPase 1	Q9NTK5	8	2	23	105	33	No	45	7.6
107b	Glucose-6-phosphate 1-dehydrogenase	P11413	6	2	15	78	37	No	59	6.4
109b	Heterogeneous nuclear ribonucleoproteins A2/B1	P22626	9	2	33	139	36	No	37	9.0
110b	ATP-dependent RNA helicase DDX1	Q92499	8	3	16	90	30	No	82	6.8
115b	Elongation factor 2	P13639	11	4	16	109	49	No	95	6.4
124b	S-formylglutathione hydrolase	P10768	7	1	39	109	32	No	31	6.5
128b	Eukaryotic translation initiation factor 2 subunit 3	Q2VIR3	4	1	10	54	41	VGQEIEVRPGIVSK (47) AGGEAGVTLGQPHLSR (63) LIGWGQIR (26)	51	8.7
129b	Polyribonucleotide nucleotidyltransferase 1, mitochondrial	Q8TCS8	9	3	11	112	40	No	86	7.9
140b	Far upstream element-binding protein 2	Q92945	12	1	33	187	24	No	73	6.8
163b	Medium-chain specific acyl-CoA dehydrogenase, mitochondrial	P11310	9	1	23	130	32	No	46	8.6
170b	Far upstream element-binding protein 2	Q92945	7	1	16	94	41	No	73	6.8
209b	Phosphoglycerate kinase 1	P00558	13	4	43	175	51	No	45	8.3
289b	Lamina-associated polypeptide 2, isoform alpha	P42166	7	1	15	93	30	FQETEFLSPPR (37)	75	7.6
334b	Electron transfer flavoprotein subunit beta	P38117	7	3	31	97	35	No	28	8.2
341b	Phosphoglycerate kinase 1	P00558	5	2	18	67	38	No	45	8.3
S1(C)	Differentially expressed proteins in pH ranges 4-7 and 6-11 of the 2-DE experiment with two proteins identified in one spot
Spot No.	Protein name	Accession No.	No. matching peptides	Umatched peaks	Sequence coverage (%)	Mascot score Top hit	Mascot score 2nd hit	Peptide sequence (Mascot score)	MW (kDa)	pI
387	Sorting nexin-6	Q9UNH7	4	2	10	50	37	TFLLEYHNR (52) TVAMHEVFLCR (52)	47	5.8
387	Heterogeneous nuclear ribonucleoprotein H	P31943	8	5	28	105	31	ATENDIYNFFSPLNPVR (53) EGRPSGEAFVELESEDEVK (57)	49	5.9
577	COP9 signalosome complex subunit 8	Q99627	4	4	24	61	44	SANSELGGIWSVGQR (66)	23	5.3
577	Chromobox protein homolog 3	Q13185	3	1	22	50	34	CPQIVIAFYEER (60)	21	5.2
612	Proteasome activator complex subunit 1	Q06323	10	8	37	118	64	VDVFREDLCTK (29)	29	5.8
612	Peflin	Q9UBV8	7	2	22	64	24	NLFQQYDR (37) LSFEDFVTMTASR (62)	30	6.1
803	N(G),N(G)-dimethylarginine dimethylaminohydrolase 2	O95865	10	11	42	129	60	DFAVSTVPVSGPSHLR (66) AGAGLSSLCLVLSTRPHS (46)	30	5.7
803	F-actin-capping protein subunit beta	P47756	6	5	21	60	48	KLEVEANNAFDQYR (37)	31	5.4
840	Proteasome activator complex subunit 1	Q06323	7	5	27	83	52	No	29	5.8
840	Glutathione S-transferase P	P09211	4	1	29	52	37	No	23	5.4
83b	Septin-6	Q14141	14	5	30	101	41	No	50	6.2
83b	Tubulin beta chain	P07437	12	19	31	103	101	No	50	4.8
150b	Adenylosuccinate lyase	P30566	5	5	11	50	41	AAGGDHGSPDSYR (67) AAGGDHGSPDSYRSPLASR (56)	55	6.7
150b	Fascin	Q16658	4	1	8	39	33	LINRPIIVFR (53)	55	6.8
