# Supplementary material for: Cancer Cell Response to Anthracyclines Effects: Mysteries of the Hidden Proteins Associated with These Drugs
Source: MDPI journal article supplement (doi:10.3390/ijms131215536), 2012-11-22
Supplement: s3 [file s3]

## Sheet: CisPtTAXonly
Supplemental Table 2. List of identified changed proteins. Identified proteins typical for individual treatment with S2A: cisplatin (CisPt); S2B: paclitaxel (TAX). Proteins with overlap between CisPt and TAX are listed in S2C; between CisPt and DNR in S2D; between CisPt and DOXO in S2E; between CisPt and MTX in S2F; between TAX and DNR in S2G; between TAX and DOXO in S2H. Proteins with overlap be…
S2A	CisPt
Drug	Spot No.	Protein name	Gene Name	UniProt No.	Biological function	pH	Change	Fold change	p-value
CisPt	8b	Phosphoglycerate kinase 1	PGK1	P00558	5	6-11	↑	1.93	0.0009
CisPt	22b	Glucose-6-phosphate isomerase	GPI	P06744	5	6-11	↑	2.97	0.0029
CisPt	34b	Inosine-5'-monophosphate dehydrogenase 2	IMPDH2	P12268	5	6-11	↑	1.66	0.0082
CisPt	53b	Poly(rC)-binding protein 1	PCBP1	Q15365	5	6-11	↑	1.53	0.0069
CisPt	83b	Septin-6	SEPT6	Q14141	1	6-11	↑	1.81	0.0093
CisPt	83b	Tubulin beta chain	TUBB	P07437	1	6-11	↑	1.81	0.0093
CisPt	129b	Polyribonucleotide nucleotidyltransferase 1, mitochondrial	PNPT1	Q8TCS8	5	6-11	↓	1.75	0.0071
CisPt	140	78 kDa glucose-regulated protein	HSPA5	P11021	4	4-7	↑	1.43	0.003
CisPt	144	Prohibitin	PHB	P35232	1	4-7	↓	1.36	0.0003
CisPt	209b	Phosphoglycerate kinase 1	PGK1	P00558	5	6-11	↑	2.5	0.0008
CisPt	233	Rab GDP dissociation inhibitor alpha	GDI1	P31150	1	4-7	↑	1.83	0.0007
CisPt	244	Heterogeneous nuclear ribonucleoprotein H	HNRNPH1	P31943	5	4-7	↑	1.39	0.0083
CisPt	267	Hematopoietic lineage cell-specific protein	HCLS1	P14317	5	4-7	↑	1.46	0.0062
CisPt	289b	Lamina-associated polypeptide 2, isoform alpha	TMPO	P42166	4	6-11	↓	1.48	0.0026
CisPt	295	Dynactin subunit 2	DCTN2	Q13561	1	4-7	↑	1.51	0.0046
CisPt	334b	Electron transfer flavoprotein subunit beta	ETFB	P38117	3	6-11	↑	1.64	0.0134
CisPt	341b	Phosphoglycerate kinase 1	PGK1	P00558	5	6-11	↑	1.67	0.0086
CisPt	442	Serine/threonine-protein phosphatase 2A 65 kDa regulatory subunit A alpha isoform	PPP2R1A	P30153	8	4-7	↑	1.71	0.0023
CisPt	635	Semenogelin-1	SEMG1	P04279	6	4-7	↑	3.51	0.004
CisPt	671	Charged multivesicular body protein 2a	CHMP2A	O43633	7	4-7	↑	1.64	0.0017
CisPt	783	Serine/threonine-protein phosphatase 2A 65 kDa regulatory subunit A beta isoform	PPP2R1B	P30154	8	4-7	↑	3.2	0.0056
CisPt	791	Phosphoserine phosphatase	PSPH	P78330	5	4-7	↑	1.72	0.0006
CisPt	1025	Serine/threonine-protein kinase 3	STK3	Q13188	5	4-7	↑	1.71	0.0017
CisPt	1033	Signal transducing adapter molecule 1	STAM	Q92783	7	4-7	↑	2.23	0.0036
S2B	TAX
Drug	Spot No.	Protein name	Gene Name	UniProt No.	Biological function	pH	Change	Fold change	p-value
TAX	289	Galactokinase	GALK1	P51570	5	4-7	↑	1.36	0.0068
TAX	291	Peptidyl-prolyl cis-trans isomerase FKBP5	FKBP5	Q13451	4	4-7	↑	1.48593	0.000843971
TAX	311	Protein disulfide-isomerase A3	PDIA3	P30101	5	4-7	↑	1.35626	0.00643235
TAX	318	Splicing factor, arginine/serine-rich 7	SFRS7	Q16629	5	4-7	↓	1.35	0.00339374
TAX	387	Sorting nexin-6	SNX6	Q9UNH7	7	4-7	↑	1.57228	0.00411909
TAX	387	Heterogeneous nuclear ribonucleoprotein H	HNRNPH1	P31943	5	4-7	↑	1.57228	0.00411909
TAX	428	Quinone oxidoreductase-like protein 1	CRYZL1	O95825	5	4-7	↑	1.59145	0.00248802
TAX	569	SUMO-activating enzyme subunit 2	UBA2	Q9UBT2	5	4-7	↑	1.37796	0.0013173
TAX	583	Dual specificity mitogen-activated protein kinase kinase 2	MAP2K2	P36507	5	4-7	↑	1.40455	0.00752064
TAX	597	Succinyl-CoA:3-ketoacid-coenzyme A transferase 1, mitochondrial	OXCT1	P55809	5	4-7	↑	1.38121	5e-05
TAX	645	Gametocyte-specific factor 1	GTSF1	Q8WW33	8	4-7	↓	5.21	0.00391053
TAX	702	4-trimethylaminobutyraldehyde dehydrogenase	ALDH9A1	P49189	5	4-7	↑	1.36	0.0041
TAX	791	Phosphoserine phosphatase	PSPH	P78330	5	4-7	↑	1.37649	0.00813259
TAX	801	Hypoxia up-regulated protein 1	HYOU1	Q9Y4L1	4	4-7	↑	1.47358	0.00749757
TAX	1415	Crk-like protein	CRKL	P46109	1	4-7	↓	2.11	0.00786214
S2C	CisPt+TAX
Drug	Spot No.	Protein name	Gene Name	UniProt No.	Biological function	pH	Change	Fold change	p-value
CisPt	41	Gamma-enolase	ENO2	P09104	5	4-7	↑	1.74	0.0029
TAX	41	Gamma-enolase	ENO2	P09104	5	4-7	↑	1.55061	0.00379741
CisPt	382	Annexin A5	ANXA5	P08758	1	4-7	↑	1.59	0.0017
TAX	382	Annexin A5	ANXA5	P08758	1	4-7	↑	1.43752	0.00160175
CisPt	561	Gamma-enolase	ENO2	P09104	5	4-7	↑	2.13	0.0012
TAX	561	Gamma-enolase	ENO2	P09104	5	4-7	↑	1.83618	0.00120076
S2D	CisPt+DNR
Drug	Spot No.	Protein name	Gene Name	UniProt No.	Biological function	pH	Change	Fold change	p-value
CisPt	107b	Glucose-6-phosphate 1-dehydrogenase	G6PD	P11413	5	6-11	↑	1.98	0.0291
DNR	107b	Glucose-6-phosphate 1-dehydrogenase	G6PD	P11413	5	6-11	↓	2.95	0.0013
S2E	CisPt+DOXO
Drug	Spot No.	Protein name	Gene Name	UniProt No.	Biological function	pH	Change	Fold change	p-value
CisPt	63b	EH domain-containing protein 1	EHD1	Q9H4M9	7	6-11	↑	1.52	0.0013
DOXO	63b	EH domain-containing protein 1	EHD1	Q9H4M9	7	6-11	↑	1.79	0.049
CisPt	163b	Medium-chain specific acyl-CoA dehydrogenase, mitochondrial	ACADM	P11310	3	6-11	↓	1.67	0.0002
DOXO	163b	Medium-chain specific acyl-CoA dehydrogenase, mitochondrial	ACADM	P11310	3	6-11	↓	1.45	0.0025
CisPt	170b	Far upstream element-binding protein 2	KHSRP	Q92945	5	6-11	↑	1.55	0.013
DOXO	170b	Far upstream element-binding protein 2	KHSRP	Q92945	5	6-11	↑	1.89	0.0013
CisPt	592	Ezrin	EZR	P15311	1	4-7	↑	2.08	0.0028
DOXO	592	Ezrin	EZR	P15311	1	4-7	↑	2.59	0.0071
S2F	CisPt+MTX
Drug	Spot No.	Protein name	Gene Name	UniProt No.	Biological function	pH	Change	Fold change	p-value
CisPt	615	Transformer-2 protein homolog beta	TRA2B	P62995	5	4-7	↑	1.81	0.0002
MTX	615	Transformer-2 protein homolog beta	TRA2B	P62995	5	4-7	↓	1.93	0.0025
S2G	TAX+DNR
Drug	Spot No.	Protein name	Gene Name	UniProt No.	Biological function	pH	Change	Fold change	p-value
TAX	407	Protein phosphatase methylesterase 1	PPME1	Q9Y570	5	4-7	↑	1.494	0.00327669
DNR	407	Protein phosphatase methylesterase 1	PPME1	Q9Y570	5	4-7	↑	1.44	0.0083
S2H	TAX+DOXO
Drug	Spot No.	Protein name	Gene Name	UniProt No.	Biological function	pH	Change	Fold change	p-value
TAX	364	4-trimethylaminobutyraldehyde dehydrogenase	ALDH9A1	P49189	5	4-7	↑	1.4425	0.00329361
DOXO	364	4-trimethylaminobutyraldehyde dehydrogenase	ALDH9A1	P49189	5	4-7	↑	1.51	0.0033
TAX	699	Rho GDP-dissociation inhibitor 2	ARHGDIB	P52566	1	4-7	↓	1.74	0.00209438
DOXO	699	Rho GDP-dissociation inhibitor 2	ARHGDIB	P52566	1	4-7	↓	2	0.0015
S2I	CisPt+DOXO+MTX
Drug	Spot No.	Protein name	Gene Name	UniProt No.	Biological function	pH	Change	Fold change	p-value
CisPt	25b	Peptidyl-prolyl cis-trans isomerase	PPIA	P62937	4	6-11	↓	1.46	0.0069
DOXO	25b	Peptidyl-prolyl cis-trans isomerase	PPIA	P62937	4	6-11	↓	1.85	0.0023
MTX	25b	Peptidyl-prolyl cis-trans isomerase	PPIA	P62937	4	6-11	↓	1.7	0.0025
S2J	CisPt+DNR+TAX
Drug	Spot No.	Protein name	Gene Name	UniProt No.	Biological function	pH	Change	Fold change	p-value
CisPt	126	Cofilin-1	CFL1	P23528	1	4-7	↑	2.13	0.0013
TAX	126	Cofilin-1	CFL1	P23528	1	4-7	↑	1.5231	0.00900513
DNR	126	Cofilin-1	CFL1	P23528	1	4-7	↑	2.01	0.0045
S2K	CisPt+TAX+MTX
Drug	Spot No.	Protein name	Gene Name	UniProt No.	Biological function	pH	Change	Fold change	p-value
CisPt	109b	Heterogeneous nuclear ribonucleoproteins A2/B1	HNRNPA2B1	P22626	5	6-11	↓	1.42	0.0064
TAX	109b	Heterogeneous nuclear ribonucleoproteins A2/B1	HNRNPA2B1	P22626	5	6-11	↑	1.47	0.0074
MTX	109b	Heterogeneous nuclear ribonucleoproteins A2/B1	HNRNPA2B1	P22626	5	6-11	↓	1.87	0.0071
S2L	TAX+DNR+MTX
Drug	Spot No.	Protein name	Gene Name	UniProt No.	Biological function	pH	Change	Fold change	p-value
TAX	413	NADH-ubiquinone oxidoreductase 75 kDa subunit, mitochondrial	NDUFS1	P28331	3	4-7	↑	1.45323	0.00736062
DNR	413	NADH-ubiquinone oxidoreductase 75 kDa subunit, mitochondrial	NDUFS1	P28331	3	4-7	↓	1.37	0.0015
MTX	413	NADH-ubiquinone oxidoreductase 75 kDa subunit, mitochondrial	NDUFS1	P28331	3	4-7	↑	1.6	0.0073
S2M	TAX+DOXO+MTX
Drug	Spot No.	Protein name	Gene Name	UniProt No.	Biological function	pH	Change	Fold change	p-value
TAX	153	D-3-phosphoglycerate dehydrogenase	PHGDH	O43175	5	4-7	↑	1.574	0.00488762
DOXO	153	D-3-phosphoglycerate dehydrogenase	PHGDH	O43175	5	4-7	↑	1.68	0.0068
MTX	153	D-3-phosphoglycerate dehydrogenase	PHGDH	O43175	5	4-7	↑	1.9	0.0097
